# Supplementary material for: Platelet-Rich Plasma (PRP) and Adipose-Derived Stem Cell (ADSC) Therapy in the Treatment of Genital Lichen Sclerosus: A Comprehensive Review
Source: MDPI journal article supplement (doi:10.3390/ijms242216107), 2023-11-09
Supplement: s1 [file s1]

Supplementary Figure S1.

**Supplementary Figure S1 PRISMA DIAGRAM**

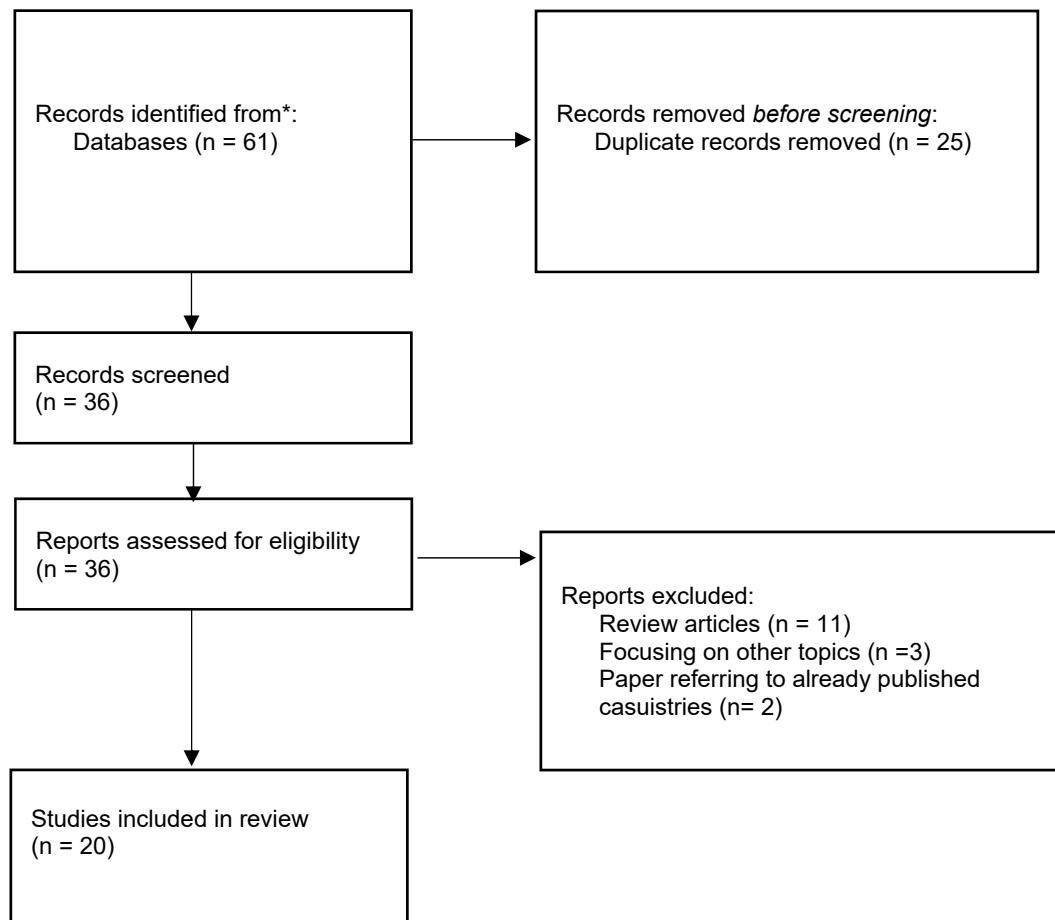

Figure S1. Flow-Chart indicating the main publications containing original data (RCT, case series or case reports) focusing on the use of ADSCs and PRP in the treatment of LS. Main Findings are summarized in Table 1 of the manuscript.

Supplementary Table S1.

**Table S1. ADSC and PRP-based treatment protocols for genital LS**

| AUTHOR                 | Y    | Therapy  | control group  | age              | n° tt      | interval | FUP m          | OUTCOMES                                                                                                  |
|------------------------|------|----------|----------------|------------------|------------|----------|----------------|-----------------------------------------------------------------------------------------------------------|
| Almadori               | 2020 | ADSC     |                |                  | 1          |          | 12.9           | pain, burning, itching, soreness, HADS, RAS, WMQR, VASS, FSFI, FSDS                                       |
| Behnia-Willison        | 2016 | PRP      |                | 60 (22-88)       |            |          | 24             | soreness, discomfort, dyspareunia, pain, itching, Australian Pelvic Floor Questionnaire                   |
| Boero                  | 2015 | ADSC     |                |                  |            |          |                | DLQI, FSFI, mucocutaneous trophism                                                                        |
| Casabona               | 2010 | ADSC+PRP |                | (27-62)          | at least 1 | 3m       |                | pain, burning, itching                                                                                    |
| Casabona               | 2017 | PRP      |                | 49.96 (+- 11.32) | (2-10)     |          | 17.6 (+- 5.63) | phimosis, splitting, inflammation, synechiae, meatus stenosis, pain, burning, itching, DLQI, IGA, Liekert |
| Casabona               | 2023 | ADSC+PRP |                |                  |            |          |                | CSS, DLQI, Skindex, FSFI                                                                                  |
| Cohen                  | 2019 | ADSC+PRP |                |                  |            |          |                | atrophy                                                                                                   |
| Franic                 | 2018 | PRP      |                | 38               | 2          | 2m       | 3              | ICIQ-VS, FSFI                                                                                             |
| Gutierrez - Ontalvilla | 2022 | ADSC+PRP | Y (topical CS) |                  |            |          | 12             | erosions, fissures, stenosis, leukoderma, pain, burning, itching, dyspareunia                             |
| Goldstein              | 2016 | PRP      |                |                  | 2          | 6w       | 3              | IGA, VAS for pruritus and burning, histological inflammation scale 0-3                                    |
| Goldstein              | 2019 | PRP      | Y (placebo)    | 52.6             | 2          | 6w       |                | CSS, histological inflammation scale 0-3                                                                  |
| Kim                    | 2017 | ADSC+PRP |                | 67               |            |          |                | pruritus, irritation, volume and tone of the labia                                                        |

|                |      |          |          |         |     |      |    |                                               |
|----------------|------|----------|----------|---------|-----|------|----|-----------------------------------------------|
| Medina Garrido | 2023 | PRP      |          |         | 3   |      | 12 | CSS                                           |
| Monreal        | 2020 | ADSC     |          |         |     |      | 24 | modified vulvo-vaginal symptoms questionnaire |
| Navarrete      | 2020 | PRP      |          |         | 6.8 | 8w   | 18 | DLQI, IGA                                     |
| Onesti         | 2016 | ADSC     |          |         | 2   | 3m   |    | trphism, pain                                 |
| Tedesco        | 2019 | PRP      |          |         | 3   | 15 d |    | pain, burning, itching, dyspareunia           |
| Tedesco        | 2020 | ADSC+PRP | Y (ADSC) | (43-78) |     |      |    | DLQI                                          |
| Tedesco        | 2021 | PRP      |          |         | 1   |      | 1  | skin temperature (°C)                         |
| Tedesco        | 2022 | PRP      |          |         | 3   | 15 d | 6  | pain, burning, itching, dyspareunia           |
